# Supplementary material
Source: HighWire-hosted journal article supplement (https://cmajopen.ca/highwire/filestream/80990/field_highwire_adjunct_files/3/open-2016-0056-original-submission.pdf)
Supplement: open-2016-0056-original-submission.pdf [file open-2016-0056-original-submission.pdf]

1  
2  
3  
4  
5 **A population-based analysis of long-term sedative use among**  
6 **community-dwelling adults**  
7  
8  
9

10  
11 Deirdre Weymann, MA  
12 University of British Columbia  
13 School of Population and Public Health  
14 201-2206 East Mall  
15 Vancouver, BC V6T1Z3  
16 Canada

17  
18 British Columbia Cancer Agency  
19 Canadian Centre for Applied Research in Cancer Control  
20 675 W 10th Ave  
21 Vancouver, BC, V5Z 1L3  
22 Canada  
23

24  
25 Emilie J. Gladstone, MPH  
26 University of British Columbia  
27 School of Population and Public Health  
28 201-2206 East Mall  
29 Vancouver, BC V6T1Z3  
30 Canada  
31

32  
33 Kate Smolina, PhD  
34 University of British Columbia  
35 School of Population and Public Health  
36 201-2206 East Mall  
37 Vancouver, BC V6T1Z3  
38 Canada  
39

40  
41 Steven G. Morgan, PhD (corresponding author)  
42 University of British Columbia  
43 School of Population and Public Health  
44 267-2206 East Mall  
45 Vancouver, BC V6T1Z3  
46 Canada  
47 Email: [steve.morgan@ubc.ca](mailto:steve.morgan@ubc.ca)  
48  
49  
50

51  
52 Keywords: Benzodiazepines, sedatives, trends, prescribing, age  
53  
54  
55  
56  
57  
58  
59  
60

## Abstract

**Background:** Chronic use of benzodiazepines and benzodiazepine-like sedatives (z-drugs) presents substantial risks to individuals of all ages. We assess trends in long-term sedative use among community-dwelling adults in British Columbia.

**Methods:** Using population-based linked administrative databases, we examined longitudinal trends in age-standardized rates of sedative use among different age groups of community-dwelling adults age 18 and older from 2004 to 2013. For each calendar year, we classified adults as non-users, short-term users, or long-term users of sedatives based on their patterns of sedative dispensations. For calendar year 2013, we applied cross-sectional analysis and estimated logistic regression models identifying health and socio-economic risk factors associated with long-term sedative use.

**Results:** More than half (53.4%) of long-term users of sedatives in British Columbia are between ages 18 and 64 (young/middle-aged adults). From 2004 to 2013, long-term sedative use remained stable among adults over age 65 (older adults) and increased slightly among young/middle-aged adults. While use of benzodiazepines decreased during the period, that trend was offset by equal or greater increases in long-term use of z-drugs. Being older, sicker, poorer, and single were associated with increased odds of long-term sedative use.

**Interpretation:** Despite efforts to stem such patterns of medication use, long-term use of sedatives increased in British Columbia between 2004 and 2013, driven largely by increased prevalence among middle-aged adults. Future deprescribing efforts targeting adults of all ages may be more successful.

**Trial registration:** Not applicable

1  
2  
3  
4  
5 Benzodiazepines and benzodiazepine-like sedatives (zopiclone, zolpidem, and zaleplon), termed  
6  
7 z-drugs, are commonly prescribed to treat anxiety and insomnia but are contraindicated for long-  
8  
9 term use (1,2). Chronic use of sedatives presents serious risks, including dependence, abuse, and  
10  
11 cognitive and psychomotor impairment (3-6). Numerous efforts have aimed to curb long-term  
12  
13 sedative use, particularly among older adults, yet these policies have not had significant effects  
14  
15 (7-10). Most efforts to curb chronic sedative prescribing have focused on benzodiazepines,  
16  
17 ignoring z-drugs despite indications that recent prescribing trends favor z-drugs over  
18  
19 benzodiazepines (11-13). Stable trends in long-term sedative dispensing may mask underlying  
20  
21 variation in benzodiazepine and z-drug dispensing. Indeed, decreases in benzodiazepine  
22  
23 dispensing accompanied by concurrent increases in z-drug dispensing, are documented in Europe  
24  
25 (14-16). Little is known about long-term sedative use in North American settings. Furthermore,  
26  
27 existing studies of long-term sedative use primarily focus on older adults (17-20). Yet, long-term  
28  
29 sedative use among younger adults is also contraindicated and is worthy of examination.  
30  
31  
32  
33  
34

35  
36 We assess trends in benzodiazepine and z-drug dispensations among all community-  
37  
38 dwelling adults in British Columbia (BC), Canada from 2004 to 2013. We determine the extent  
39  
40 to which patterns of sedative use vary by age and sex and identify medical and socio-economic  
41  
42 risk factors associated with long-term sedative use for adults over and under age 65. Given that  
43  
44 past research shows women are more likely to receive prescriptions for sedatives than men  
45  
46 (7,8,14,21), we sex-stratified our analyses where appropriate.  
47  
48  
49  
50  
51  
52  
53  
54  
55  
56  
57  
58  
59  
60

## Methods

### *Data*

We based our retrospective analysis on de-identified linked health datasets provided by Population Data BC with approval of relevant data stewards (22-24). Datasets included information on all British Columbians over age 17, except those whose prescription drug coverage fell under federal jurisdiction (military veterans, registered First Nations and Inuit, and federal penitentiary inmates, which collectively make up ~4% of BC's population). To ensure complete pharmaceutical data capture, we only included individuals living in BC for at least 275 days in any year from 2004 until 2013. Similar to past studies (19,21), we focused our analysis on community-dwelling adults and excluded long-term care facility residents (0.7% of the population and 3% of sedative users).

Data on pharmaceutical dispensations came from PharmaNet, an information system into which pharmacists must, by law, enter records of every prescription dispensed outside of acute care hospitals (25). We grouped prescription drugs according to the World Health Organization's Anatomical Therapeutic Chemical (ATC) drug classification system (26). We identified benzodiazepine and z-drug prescriptions using ATC level 5 codes (Appendix A).

We linked prescription history to hospital discharge data containing up to 25 diagnosis codes (ICD-10) per hospitalization and to medical services data from the BC Medical Services Plan Payment File, which included one primary diagnosis code (ICD-9) for every fee-for-service medical visit. Hospital services data came from the Discharge Abstract Database, which tracks in-patient separations from all hospitals in BC. We did not have access to medical services data for care funded by alternative payments (e.g., capitation funded health clinics). We therefore

1  
2  
3  
4  
5 excluded a small number of geographic areas (e.g., northern and inner-city communities) that  
6  
7 receive 25% or more of their medical care from non-fee-for-service providers. This exclusion  
8  
9 affected an additional 4% of the study population.  
10

### 11 12 13 *Derived Variables*

14  
15 We used the John Hopkins Adjusted Clinical Group (ACG version 10.0) case-mix  
16  
17 adjustment system to adjust for health status (27). Specifically, we constructed a count of the  
18  
19 number of major and number of minor Aggregated Diagnostic Groups (ADGs). Counts of ADGs  
20  
21 are predictive of mortality and health services utilization (28,29).  
22  
23

24  
25 We estimated household income based on a combination of household-specific and area-  
26  
27 based income data (30). For 52% of the population, we had validated, household-specific income  
28  
29 information from registration files for BC's income-based public drug plan (Fair PharmaCare).  
30  
31 For the remaining 48% of the population, we estimated household income based on median  
32  
33 household income for the Census Dissemination Area in which people lived. Individuals with  
34  
35 missing household and area-based income data were excluded from the analysis (~2%).  
36  
37

38  
39 Prior research suggests there may be ethnic differences in use of medicines as a result of  
40  
41 cultural, environmental, and biologic factors (31-34). We sought to identify whether likelihood  
42  
43 of long-term sedatives use varies according to ethnicity. Since there are no population-based  
44  
45 sources of information on ethnicity that could be linked to our datasets, we estimated ethnicity  
46  
47 using a validated algorithm developed to identify surnames of South Asian and Chinese origin  
48  
49 (35).  
50  
51  
52  
53  
54  
55  
56  
57  
58  
59  
60

### *Definitions*

For each calendar year, we classified adults as non-users, short-term users, or long-term users of sedatives based on their dispensation history. We classified individuals as long-term sedative users if they filled prescriptions totaling more than 90 days' supply of benzodiazepines or z-drugs in the calendar year. We identified short-term sedative users as those who filled at least one sedative prescription and had 90 or fewer days of therapy dispensed.

Most guidelines recommend limiting sedative use to less than 28 days (36,37). Our definition of long-term use is a conservative estimate, consistent with other studies (7,38), and ensures that most individuals classified as long-term users have filled more than three sedative prescriptions in the year, given BC's public drug plan restricts dispensations of sedatives to 30 days of therapy (39).

### *Statistical Analysis*

When reporting prevalence rates for the adult population, we age-standardized annual statistics using the 2013 population in four age categories (18–44, 45–64, 65–84, and 85+). We termed adults between ages 18 and 44 young adults, those between ages 45 and 64 middle-aged adults, and those over age 65 older adults. We based these definitions on past studies examining benzodiazepine use in different age groups (40).

We studied medical and socio-economic risk factors associated with different levels of benzodiazepine use in 2013. We estimated age and sex-stratified and sex-pooled logistic regression models, incorporating explanatory variables based on well-established models of health services utilization (41,42). We included measures of sex, age, health status, income,

1  
2  
3  
4  
5 marital status, ethnicity, and neighborhood urbanization in our models. All analysis was  
6  
7 conducted in Stata 13 (43).  
8  
9

### 10 *Ethics Approval*

11 The University of British Columbia's Behavioural Research Ethics Board approved this study.  
12  
13  
14  
15

## 16 **Results**

17  
18 The population of community-dwelling adults meeting our study inclusion criteria grew  
19 from 2.94 million in 2004 to 3.22 million in 2013. These adults represented approximately 75%  
20 of the total population of the province. The study characteristics of community-dwelling British  
21 Columbians who met our inclusion criteria in 2013 are summarized in Table 1. Long-term users  
22 were most likely to be women, to be older, to have low incomes, and to have relatively poor  
23 health status. Conversely, non-users were most likely to have surnames of Chinese origin.  
24  
25  
26  
27  
28  
29  
30  
31  
32

33 Among young/middle-aged adults, long-term use of sedatives was most common among  
34 individuals aged 45 to 64 and among older adults, long-term use was most common among  
35 individuals aged 65 to 84 (Appendix B). Further, despite differences in population prevalence of  
36 long-term sedative use, more young and middle-aged adults were exposed to long-term sedative  
37 prescriptions in 2013 relative to older adults.  
38  
39  
40  
41  
42  
43  
44

### 45 *Trends in sedative use among community-dwelling adults, 2004 to 2013*

46  
47 Figure 1 depicts age-standardized trends in prevalence of overall (short-term and long-  
48 term) sedative use among community-dwelling women and men age 18 and older. All changes in  
49 prevalence of overall use were statistically significant at  $p < 0.05$ . The age-standardized  
50 proportion of community-dwelling adult women who filled at least one sedative prescription  
51  
52  
53  
54  
55  
56  
57  
58  
59  
60

1  
2  
3  
4  
5 increased from 14.2% in 2004 to 14.6% in 2013, representing a 3% increase in the age-  
6  
7 standardized prevalence rate. Similarly, the age-standardized proportion of community-dwelling  
8  
9 adult men who filled sedative prescriptions increased from 8.2% to 8.8% over the period, a 6%  
10  
11 increase in the age-standardized prevalence rate.  
12  
13

14 Stable age-standardized prevalence of overall use of sedatives masked changes in the  
15  
16 composition of sedatives prescribed. From 2004 to 2013, the age-standardized proportion of  
17  
18 community-dwelling adults dispensed a benzodiazepine declined from 11.2% to 10.0% for  
19  
20 women and declined from 6.4% to 5.6% for men. Conversely, the age-standardized proportion of  
21  
22 community-dwelling adults dispensed z-drugs increased from 4.6% to 6.6% for women and from  
23  
24 2.7% to 4.1% for men. Note that the sum of benzodiazepine users and z-drug users does not  
25  
26 equal the total number of sedative users because 1% of adults filled prescriptions for both  
27  
28 benzodiazepines and z-drugs.  
29  
30  
31  
32

33 Figures 2A and 2B show age-standardized trends in the prevalence of overall sedative use  
34  
35 among community-dwelling adults over and under age 65, respectively. From 2004 to 2013,  
36  
37 increases in z-drug use offset decreases in benzodiazepine use among community-dwelling  
38  
39 adults over age 65; consequently, age-standardized prevalence of sedative use remained stable, at  
40  
41 approximately 23% among women and approximately 15% among men. Among adults under  
42  
43 age 65, age-standardized increases in z-drug use slightly exceeded age-standardized decreases in  
44  
45 use of benzodiazepines. Thus, age-standardized prevalence of using sedatives of any type  
46  
47 increased among adults under age 65, from 11.6% to 12.2% among women and from 6.6% to  
48  
49 7.2% among men.  
50  
51  
52  
53  
54  
55  
56  
57  
58  
59  
60



1  
2  
3  
4  
5  
6  
7  
8  
9  
10  
11  
12  
13  
14  
15  
16  
17  
18  
19  
20  
21  
22  
23  
24  
25  
26  
27  
28  
29  
30  
31  
32  
33  
34  
35  
36  
37  
38  
39  
40  
41  
42  
43  
44  
45  
46  
47  
48  
49  
50  
51  
52  
53  
54  
55  
56  
57  
58  
59  
60

Figures 3A and 3B illustrate age-standardized trends in prevalence of long-term sedative use among community dwelling adults over and under age 65, respectively. All changes in prevalence of long-term benzodiazepine and z-drug use were statistically significant at  $p < 0.05$ . As shown in Figure 3A, the age-standardized prevalence of long-term sedative use among adults aged 65 and older was relative stable at approximately 14% for women and approximately 8% for men. As with trends in overall sedative use among adults aged 65 and older, the relatively stable prevalence of long-term use masked a considerable shift from benzodiazepines to z-drug sedatives.

Community dwelling adults under age 65 experienced similar trends in age-standardized prevalence of long-term sedative use as adults over age 65, albeit at lower levels of utilization, as shown in Figure 3B. The age-standardized proportion of women under age 65 who filled a long-term sedative prescription increased from 4.1% to 4.5% over the period, an approximate 10% increase in the age-standardized prevalence rate. Similarly, the age-standardized proportion of men under age 65 who filled a long-term sedative prescription also increased from 2.5% to 2.9% over the period, representing an approximate 14% increase in the age-standardized prevalence rate. Across the study period, the proportion of sedative users under age 65 who used 90 or more days of them in the given year grew from approximately 36% to 38%.

#### *Variations in sedative use among community-dwelling adults in 2013*

Table 2 shows the results of age and sex-stratified and sex-pooled logistic regression analyses for the population stratified at age 65. In all regression models, being older, having poorer health status, having lower income, and being single were all significantly associated with increased odds of long-term use of sedatives. Conversely, having a surname of Chinese or South

1  
2  
3  
4  
5 Asian origin was associated with lower odds of long-term sedative use in all regression models.  
6  
7 Some effects varied across older and younger/middle-aged adult men and women. For example,  
8  
9 living in a rural area was associated with increased odds of long-term use of sedatives among  
10  
11 younger/middle-aged adult women (Adjusted odds ratio (AOR) = 1.08, 95% Confidence Interval  
12  
13 (CI) = 1.04-1.12), but decreased odds among older adult women (AOR = 0.95, 95% CI = 0.91-  
14  
15 0.98). Further, living in a rural area had no significant effect on odds of long-term use among  
16  
17 either younger/middle-aged or older adult men.  
18  
19

20  
21 After adjusting for other demographic factors and health status, sex had a statistically  
22  
23 significant effect on the odds of long-term sedative use among older adults and younger/middle-  
24  
25 aged adults. Younger and middle-aged adult women were associated with 22% higher odds of  
26  
27 long-term use of sedatives than men (AOR = 1.22, 95% CI = 1.20-1.24), and older adult women  
28  
29 were associated with 59% higher odds than men (AOR = 1.59, 95% CI = 1.57-1.62).  
30  
31  
32  
33

### 34 35 **Interpretation**

36  
37 Despite numerous safety concerns and guidelines targeting overprescribing of sedatives  
38  
39 (36,44-48), our study shows age-standardized prevalence of long-term use of these medications  
40  
41 remained stable among older adults and increased slightly among young and middle-aged adults  
42  
43 in BC from 2004 to 2013. Consistent with other studies (8,15,49), our findings illuminate  
44  
45 evolving prescribing practices favoring z-drugs over benzodiazepines. Although many  
46  
47 physicians believe z-drugs are a safer, more effective alternative to traditional benzodiazepines  
48  
49 (49), z-drugs are shown to have similar risk profiles as benzodiazepines, even in younger adult  
50  
51 populations (3,50).  
52  
53  
54  
55  
56  
57  
58  
59  
60

1  
2  
3  
4  
5 Similar to past studies (7,8,14,20,51), we found adults were associated with higher odds  
6  
7 long-term sedatives use if they were women, if they had low incomes, and if they had relatively  
8  
9 poor health status. We also found having a surname of Chinese or South Asian origin was  
10  
11 associated with a protective effect on the odds of long-term sedative use. This finding coincides  
12  
13 with other studies documenting ethnic variations in prescription drug use (52,53). Additionally,  
14  
15 being in a marriage-like relationship was associated with a statistically significant reduction in  
16  
17 odds of long-term use. While some past literature indicates marriage may have a protective effect  
18  
19 on risk of chronic use and abuse of prescription drugs (54,55), the opposite has also been true  
20  
21 (17).  
22  
23  
24  
25

26 Long-term sedative use seems to be as much a problem among middle-aged adults as it is  
27  
28 among older adults. Though there is a steep age gradient in terms of population prevalence of  
29  
30 long-term sedative use, there were actually a higher number of long-term sedative users under  
31  
32 age 65 than over age 65. Young and middle-aged chronic sedative users are subject to many of  
33  
34 the same risks associated with sedative use as older users; thus their high levels of long-term use  
35  
36 should not be ignored. Past efforts to limit chronic sedative use have focused on discontinuing  
37  
38 sedative use in older adult populations; future efforts should also consider interventions to limit  
39  
40 initiation of sedative use in young and middle-aged adult populations. Ultimately, interventions  
41  
42 targeting adults of all ages might result in the most significant gains to patient health.  
43  
44  
45  
46  
47

#### 48 *Study Limitations*

49  
50 While these data are limited in that we are unable to determine whether individuals  
51  
52 consumed all prescription drugs dispensed them, those who invest the time and out-of-pocket  
53  
54 costs to fill prescriptions likely do so with intent to consume them. Moreover, as some  
55  
56  
57  
58  
59  
60

1  
2  
3  
4  
5 prescriptions will be written but not filled, this measure is arguably an understatement of the  
6  
7 extent of long-term sedative prescribing in BC. While our findings mirror recent trends in total  
8  
9 benzodiazepine and z-drug dispensations from another Canadian province (8), it is important to  
10  
11 note that they are based on BC's population and may not be generalizable to other jurisdictions  
12  
13 with different prescription monitoring programs and deprescribing strategies in place.  
14  
15  
16

### 17 18 *Conclusions*

19  
20 Long-term benzodiazepine and z-drug dispensing continues to be a significant problem in  
21  
22 BC, as shown by the stable dispensations among older adults and increasing dispensations  
23  
24 among younger and middle-aged adults from 2004 to 2013. Our results suggest that numerous  
25  
26 warnings and policies to reduce long-term prescribing of sedatives to older adults may have only  
27  
28 resulted in the substitution of benzodiazepines with z-drug sedatives, a harmful alternative. Our  
29  
30 study also found what might be a sleeping giant in the area of sedative prescribing: the majority  
31  
32 of long-term sedative users are under age 65. Long-term sedative use appears to be common and  
33  
34 increasing slightly among middle-aged adults. Future de-prescribing efforts might best achieve  
35  
36 their goals by targeting the middle-aged adults who fill a significant proportion of total long-term  
37  
38 sedative prescriptions.  
39  
40  
41  
42  
43  
44  
45  
46  
47  
48  
49  
50  
51  
52  
53  
54  
55  
56  
57  
58  
59  
60

**Disclaimer**

All inferences, opinions, and conclusions drawn in this report are those of the authors, and do not reflect the opinions or policies of Population Data BC or the data stewards.

**Competing interests**

The authors have no competing interests to declare.

**Funding**

This study was funded by the Canadian Institute for Health Research and, in part, by a Banting Postdoctoral Fellowship [KS]. The funding body was not involved in the study design, analysis, interpretation of the data, or writing of this manuscript.

**Authors' contributions**

All authors were involved in the conceptualization and design of the study and the interpretation of data. DW conducted the analysis and drafted the manuscript. EG and KS revised the manuscript for important intellectual content. SM acquired the data and revised the manuscript for important intellectual content. All authors give final approval of the version to be published and agree to act as guarantors of the work.

## References

1. Donoghue J, Lader M. Usage of benzodiazepines: a review. *Int J Psychiatry Clin Pract*. 2010;14(2):78-87.
2. Kurko T, Saastamoinen L, Tähkääpää S, Tuulio-Henriksson A, Taiminen T, Tiihonen J, et al. Long-term use of benzodiazepines: Definitions, prevalence and usage patterns—a systematic review of register-based studies. *Eur Psychiatry*. 2015;30(8):1037-47.
3. Gustavsen I, Bramness JG, Skurtveit S, Engeland A, Neutel I, Mørland J. Road traffic accident risk related to prescriptions of the hypnotics zopiclone, zolpidem, flunitrazepam and nitrazepam. *Sleep Med*. 2008;9(8):818-22.
4. Leipzig RM, Cumming RG, Tinetti ME. Drugs and Falls in Older People: A Systematic Review and Meta - analysis: I. Psychotropic Drugs. *J Am Geriatr Soc*. 1999;47(1):30-9.
5. Kripke DF. Chronic hypnotic use: deadly risks, doubtful benefit: review article. *Sleep Med Rev*. 2000;4(1):5-20.
6. Rapoport MJ, Lanctôt KL, Streiner DL, Bedard M, Vingilis E, Murray B, et al. Benzodiazepine use and driving: a meta-analysis. *J Clin Psychiatry*. 2009;70(5):663.
7. Cunningham CM, Hanley GE, Morgan S. Patterns in the use of benzodiazepines in British Columbia: examining the impact of increasing research and guideline cautions against long-term use. *Health Policy*. 2010;97(2):122-9.
8. Alessi-Severini S, Bolton JM, Enns MW, Dahl M, Collins DM, Chateau D, et al. Use of benzodiazepines and related drugs in Manitoba: a population-based study. *Canadian Medical Association Open Access Journal*. 2014;2(4):E208-E16.
9. Morgan S, Smolina K, Mooney D, Raymond C, Bowen ML, Gorczynski C, et al. *The Canadian Rx Atlas*. 2013.
10. Sonnenberg CM, Bierman EJ, Deeg DJ, Comijs HC, van Tilburg W, Beekman AT. Ten-year trends in benzodiazepine use in the Dutch population. *Soc Psychiatry Psychiatr Epidemiol*. 2012;47(2):293-301.
11. Dündar Y, Boland A, Strobl J, Dodd S, Haycox A, Bagust A, et al. Newer hypnotic drugs for the short-term management of insomnia: a systematic review and economic evaluation. 2004.
12. Lader M. Benzodiazepines revisited—will we ever learn? *Addiction*. 2011;106(12):2086-109.
13. Lader M. Benzodiazepine harm: how can it be reduced? *Br J Clin Pharmacol*. 2014;77(2):295-301.
14. Johnell K, Fastbom J. The use of benzodiazepines and related drugs amongst older people in Sweden: associated factors and concomitant use of other psychotropics. *Int J Geriatr Psychiatry*. 2009;24(7):731-8.
15. Hoffmann F, Hies M, Glaeske G. Regional variations of private prescriptions for the non - benzodiazepine hypnotics zolpidem and zopiclone in Germany. *Pharmacoepidemiol Drug Saf*. 2010;19(10):1071-7.
16. Hausken AM, Furu K, Skurtveit S, Engeland A, Bramness JG. Starting insomnia treatment: the use of benzodiazepines versus z-hypnotics. A prescription database study of predictors. *Eur J Clin Pharmacol*. 2009;65(3):295-301.

17. Luijendijk HJ, Tiemeier H, Hofman A, Heeringa J, Stricker BHC. Determinants of chronic benzodiazepine use in the elderly: a longitudinal study. *Br J Clin Pharmacol*. 2008;65(4):593-9.
18. Fortin D, Prévaille M, Ducharme C, Hébert R, Trottier L, Grégoire J-P, et al. Factors associated with long-term benzodiazepine use among elderly women and men in Quebec. *J Women Aging*. 2007;19(3-4):37-52.
19. Fourrier A, Letenneur L, Dartigues J, Moore N, Bégaud B. Benzodiazepine use in an elderly community-dwelling population. *Eur J Clin Pharmacol*. 2001;57(5):419-25.
20. Tu K, Mamdani MM, Hux JE, Tu Jb. Progressive trends in the prevalence of benzodiazepine prescribing in older people in Ontario, Canada. *J Am Geriatr Soc*. 2001;49(10):1341-5.
21. Egan M, Moride Y, Wolfson C, Monette J. Long - Term Continuous Use of Benzodiazepines by Older Adults in Quebec: Prevalence, Incidence and Risk Factors. *J Am Geriatr Soc*. 2000;48(7):811-6.
22. BC Ministry of Health [creator] (2015): Medical Services Plan (MSP) Payment Information File. Population Data BC [publisher]. Data Extract. MOH (2014). <http://www.popdata.bc.ca/data>.
23. BC Ministry of Health [creator] (2015): PharmaNet. BC Ministry of Health [publisher]. Data Extract. Data Stewardship Committee (2014). <http://www.popdata.bc.ca/data>.
24. Canadian Institute for Health Information [creator] (2015): Discharge Abstract Database (Hospital Separations). Population Data BC [publisher]. Data Extract. MOH (2014).
25. British Columbia. What Is PharmaNet? Victoria: Pharmacare, BC Ministry of Health; 2014 [cited 2014 July 7]. Available from: <http://www.health.gov.bc.ca/pharmacare/pharmanet/netindex.html>.
26. World Health Organization Collaborating Centre for Drug Statistics Methodology. Anatomical Therapeutic Chemical Code Classification index with Defined Daily Doses Oslo: World Health Organization Collaborating Centre for Drug Statistics Methodology; 2014 [cited 2014 4 Feb]. Available from: <http://www.whocc.no/atcddd/>.
27. Weiner J, Abrams C. The Johns Hopkins ACG System Technical Reference Guide. Baltimore, MD The Perl Foundation (2010) Perl. 2009;5:762-5.
28. Hanley GE, Morgan S, Reid RJ. Explaining prescription drug use and expenditures using the adjusted clinical groups case-mix system in the population of British Columbia, Canada. *Medical care*. 2010;48(5):402-8.
29. Baldwin L-M, Klabunde CN, Green P, Barlow W, Wright G. In search of the perfect comorbidity measure for use with administrative claims data: does it exist? *Med Care*. 2006;44(8).
30. Hanley G, Morgan S. On the validity of area-based income measures to proxy household income. *BMC Health Services Research*. 2008;8(1):79. PubMed PMID: doi:10.1186/1472-6963-8-79.
31. Gaskin DJ, Briesacher BA, Limcangco R, Brigantti BL. Exploring racial and ethnic disparities in prescription drug spending and use among Medicare beneficiaries. *The American journal of geriatric pharmacotherapy*. 2006;4(2):96-111.

- 1  
2  
3  
4  
5 32. Morgan SG, Hanley G, Cunningham C, Quan H. Ethnic differences in the use of  
6 prescription drugs: a cross-sectional analysis of linked survey and administrative data. *Open*  
7 *Med.* 2011;5(2):87-93.
- 8 33. Kee JH, Salerno E. Race, culture, and medications. *J Emerg Nurs.* 1995;21(6):560-2.
- 9 34. Burroughs VJ, Maxey RW, Levy RA. Racial and ethnic differences in response to  
10 medicines: towards individualized pharmaceutical treatment. *J Natl Med Assoc.* 2002;94(10  
11 Suppl):1.
- 12 35. Shah BR, Chiu M, Amin S, Ramani M, Sadry S, Tu JV. Surname lists to identify South  
13 Asian and Chinese ethnicity from secondary data in Ontario, Canada: a validation study. *BMC*  
14 *medical research methodology.* 2010;10(1):42.
- 15 36. McIntosh B, Clark M, Spry C. Benzodiazepines in older adults: a review of clinical  
16 effectiveness, cost-effectiveness, and guidelines. 2011.
- 17 37. Centre NP. Benzodiazepines and newer hypnotics 2005; 15:17-20 [November 3, 2015].  
18 Available from:  
19 [http://filesdown.esecure.co.uk/NorthLancsPCT/MeRec\\_Bull\\_15\\_5\\_.pdf\\_07012011-1137-24.pdf](http://filesdown.esecure.co.uk/NorthLancsPCT/MeRec_Bull_15_5_.pdf_07012011-1137-24.pdf).
- 20 38. Neutel CI. The epidemiology of long-term benzodiazepine use. *International Review of*  
21 *Psychiatry.* 2005;17(3):189-97.
- 22 39. Services BCMoH. General PharmaCare Coverage  
23 Policies [November 5, 2015]. Available from: [http://www2.gov.bc.ca/gov/content/health/health-](http://www2.gov.bc.ca/gov/content/health/health-drug-coverage/pharmacare-for-bc-residents/what-we-cover/general-coverage-policies)  
24 [drug-coverage/pharmacare-for-bc-residents/what-we-cover/general-coverage-policies](http://www2.gov.bc.ca/gov/content/health/health-drug-coverage/pharmacare-for-bc-residents/what-we-cover/general-coverage-policies).
- 25 40. Olfson M, King M, Schoenbaum M. Benzodiazepine use in the United States. *JAMA*  
26 *psychiatry.* 2015;72(2):136-42.
- 27 41. Andersen RM. Revisiting the behavioral model and access to medical care: does it  
28 matter. *Journal of Health and Social Behavior.* 1995;36(1):1-10.
- 29 42. Phillips KA, Morrison KR, Andersen R, Aday LA. Understanding the context of  
30 healthcare utilization: assessing environmental and provider-related variables in the behavioral  
31 model of utilization. *Health Services Research.* 1998;33(3 Pt 1):571-96.
- 32 43. StataCorp L. Stata 13. College Station: StataCorp LP. 2014.
- 33 44. Initiative T. Use of Benzodiazepines in BC: Is it consistent with recommendations.  
34 *University of British Columbia Therapeutics Letter.* 2004;54:1-2.
- 35 45. Nelson J, Chouinard G. Guidelines for the clinical use of benzodiazepines:  
36 pharmacokinetics, dependency, rebound and withdrawal. *Canadian Society for Clinical*  
37 *Pharmacology. The Canadian journal of clinical pharmacology= Journal canadien de*  
38 *pharmacologie clinique.* 1998;6(2):69-83.
- 39 46. el-Guebaly N, Stein MB. Are there guidelines for the responsible prescription of  
40 benzodiazepines? *Canadian Journal of Psychiatry.* 2010;55(11):709.
- 41 47. By the American Geriatrics Society Beers Criteria Update Expert P. American Geriatrics  
42 Society 2015 Updated Beers Criteria for Potentially Inappropriate Medication Use in Older  
43 Adults. *J Am Geriatr Soc.* 2015:n/a-n/a.
- 44 48. Smith N QK, Chelak K, Fitzsimmons H. Narcotics, benzodiazepines, stimulants, and  
45 gabapentin: policies, initiatives, and practices across Canada, 2014. Ottawa: Canadian Agency  
46 for Drugs and Technologies in Health Environmental Scan. 2014 (Issue 45).
- 47  
48  
49  
50  
51  
52  
53  
54  
55  
56  
57  
58  
59  
60



- 1  
2  
3  
4  
5 49. Siriwardena AN, Qureshi Z, Gibson S, Collier S, Latham M. GPs' attitudes to  
6 benzodiazepine and 'Z-drug' prescribing: a barrier to implementation of evidence and guidance  
7 on hypnotics. *Br J Gen Pract.* 2006;56(533):964-7.  
8  
9 50. Orriols L, Philip P, Moore N, Castot A, Gadegbeku B, Delorme B, et al. Benzodiazepine  
10 - Like Hypnotics and the Associated Risk of Road Traffic Accidents. *Clin Pharmacol Ther.*  
11 2011;89(4):595-601.  
12 51. Rosman S, Le Vaillant M, Pelletier-Fleury N. Gaining insight into benzodiazepine  
13 prescribing in general practice in France: a data-based study. *BMC Fam Pract.* 2011;12(1):28.  
14 52. Puyat JH, Hanley GE, Cunningham CM, Law MR, Wong ST, Sutherland JM, et al.  
15 Ethnic Disparities in Antipsychotic Drug Use in British Columbia: A Cross-Sectional  
16 Retrospective Study. *Psychiatric Services.* 2011;62(9):1-9.  
17 53. Valenstein M, Taylor KK, Austin K, Kales HC, McCarthy JF, Blow FC. Benzodiazepine  
18 use among depressed patients treated in mental health settings. *Am J Psychiatry.* 2004.  
19 54. Edlund MJ, Steffick D, Hudson T, Harris KM, Sullivan M. Risk factors for clinically  
20 recognized opioid abuse and dependence among veterans using opioids for chronic non-cancer  
21 pain. *Pain.* 2007;129(3):355-62.  
22 55. Jorm AF, Grayson D, Creasey H, Waite L, Broe G. Long-term benzodiazepine use by  
23 elderly people living in the community. *Aust N Z J Public Health.* 2000;24(1):7.  
24  
25  
26  
27  
28  
29  
30  
31  
32  
33  
34  
35  
36  
37  
38  
39  
40  
41  
42  
43  
44  
45  
46  
47  
48  
49  
50  
51  
52  
53  
54  
55  
56  
57  
58  
59  
60

## Figures and Tables

Table 1: Characteristics of different sedative user groups among community-dwelling women and men aged 18 and older, British Columbia, 2013

| Variable                         | Non-Users of Sedatives |      | Short-term Sedatives Users |      | Long term Sedatives Users |      |
|----------------------------------|------------------------|------|----------------------------|------|---------------------------|------|
|                                  | N                      | %    | N                          | %    | N                         | %    |
| <b>Population</b>                | 2,837,834              | 88.2 | 206,059                    | 6.4  | 172,276                   | 5.4  |
| <b>Using Benzodiazepines</b>     | 0                      | 0.0  | 142,061                    | 68.9 | 98,107                    | 57.0 |
| <b>Using Z-drugs</b>             | 0                      | 0.0  | 79,053                     | 38.4 | 87,840                    | 51.0 |
| <b>Sex</b>                       |                        |      |                            |      |                           |      |
| Women                            | 1,411,861              | 49.8 | 132,318                    | 64.2 | 109,264                   | 63.4 |
| Men                              | 1,425,973              | 50.3 | 73,741                     | 35.8 | 63,012                    | 36.6 |
| <b>Age</b>                       |                        |      |                            |      |                           |      |
| 18-44                            | 1,246,832              | 43.9 | 66,602                     | 32.3 | 22,459                    | 13.0 |
| 45-64                            | 1,028,052              | 36.2 | 86,474                     | 42.0 | 71,086                    | 41.3 |
| 65-84                            | 487,515                | 17.2 | 47,057                     | 22.8 | 65,313                    | 37.9 |
| 85+                              | 75,435                 | 2.7  | 5,926                      | 2.9  | 13,418                    | 7.8  |
| <b>Count of Major ADGs</b>       |                        |      |                            |      |                           |      |
| 0 Major ADGs                     | 1,938,119              | 68.3 | 94,655                     | 45.9 | 54,917                    | 31.9 |
| 1-2 Major ADG                    | 809,027                | 28.5 | 90,995                     | 44.2 | 88,901                    | 51.6 |
| 3+ Major ADGs                    | 90,688                 | 3.2  | 20,409                     | 9.9  | 28,458                    | 16.5 |
| <b>Count of Minor ADGs</b>       |                        |      |                            |      |                           |      |
| 0-1 Minor ADGs                   | 996,680                | 35.1 | 16,131                     | 7.8  | 8,700                     | 5.1  |
| 2-3 Minor ADGs                   | 866,290                | 30.5 | 51,610                     | 25.1 | 34,445                    | 20.0 |
| 4-5 Minor ADGs                   | 578,867                | 20.4 | 60,936                     | 29.6 | 48,277                    | 28.0 |
| 6+ Minor ADGs                    | 395,997                | 14.0 | 77,382                     | 37.6 | 80,854                    | 46.9 |
| <b>Income Quintile</b>           |                        |      |                            |      |                           |      |
| Lowest                           | 564,644                | 19.9 | 49,035                     | 23.8 | 55,597                    | 32.3 |
| Second                           | 589,608                | 20.8 | 38,898                     | 18.9 | 36,131                    | 21.0 |
| Third                            | 545,222                | 19.2 | 33,156                     | 16.1 | 25,568                    | 14.8 |
| Fourth                           | 574,352                | 20.2 | 37,345                     | 18.1 | 25,379                    | 14.7 |
| Fifth                            | 564,008                | 19.9 | 47,625                     | 23.1 | 29,601                    | 17.2 |
| <b>Relationship Status</b>       |                        |      |                            |      |                           |      |
| Marriage-like relationship       | 1,553,729              | 54.8 | 114,960                    | 55.8 | 88,367                    | 51.3 |
| Single                           | 1,284,105              | 45.3 | 91,099                     | 44.2 | 83,909                    | 48.7 |
| <b>Ethnicity</b>                 |                        |      |                            |      |                           |      |
| Other                            | 2,357,019              | 83.1 | 185,958                    | 90.3 | 161,502                   | 93.8 |
| Chinese                          | 346,159                | 12.2 | 11,033                     | 5.4  | 6,733                     | 3.9  |
| South Asian                      | 134,656                | 4.8  | 9,068                      | 4.4  | 4,041                     | 2.4  |
| <b>Neighborhood Urbanization</b> |                        |      |                            |      |                           |      |
| Urban                            | 2,682,538              | 94.5 | 194,214                    | 94.3 | 161,061                   | 93.5 |
| Rural                            | 155,296                | 5.5  | 11,845                     | 5.8  | 11,215                    | 6.5  |

Note: Long-term sedative use defined by the filling of prescriptions containing a total of 90 or more days' supply of sedative during the calendar year. Drugs included as benzodiazepines and

1  
2  
3  
4  
5 z-drugs are provided in Appendix A. Aggregated Diagnostic Groups (ADGs) map ICD-9 and  
6 ICD-10 codes into 32 mutually-exclusive groups based on similar levels of severity, persistence,  
7 and health resource requirements. Of these groups, 8 have very high expected resource use and  
8 are labeled as major ADGs. Remaining ADGs are considered minor. Marriage-like relationships  
9 include common-law and married relationships between two same sex or opposite sex adults.  
10  
11  
12  
13  
14  
15  
16  
17  
18  
19  
20  
21  
22  
23  
24  
25  
26  
27  
28  
29  
30  
31  
32  
33  
34  
35  
36  
37  
38  
39  
40  
41  
42  
43  
44  
45  
46  
47  
48  
49  
50  
51  
52  
53  
54  
55  
56  
57  
58  
59  
60

Confidential

1  
2  
3  
4  
5  
6  
7  
8  
9  
10  
11  
12  
13  
14  
15  
16  
17  
18  
19  
20  
21  
22  
23  
24  
25  
26  
27  
28  
29  
30  
31  
32  
33  
34  
35  
36  
37  
38  
39  
40  
41  
42  
43  
44  
45  
46  
47  
48  
49

*Figure 1: Age-standardized prevalence of overall (short-term and long-term) sedative use among community-dwelling women and men aged 18 and older, British Columbia, 2004 to 2013*

*Figure 2A: Age-standardized prevalence of overall sedative use among community-dwelling women and men aged 65 and older, British Columbia, 2004 to 2013*

*Figure 2B: Age-standardized prevalence of overall sedative use among community-dwelling women and men aged 18 to 64, British Columbia, 2004 to 2013*

*Figure 3A: Age-standardized prevalence of long-term sedative use among community-dwelling women and men aged 65 and older, British Columbia, 2004 to 2013*

*Figure 3B: Age-standardized prevalence of long-term sedative use among community-dwelling women and men aged 18 to 64, British Columbia, 2004 to 2013*

Confidential

Table 2: Adjusted odds ratios for likelihood of long-term sedative use among community-dwelling British Columbians, age and sex-stratified and sex-pooled results

| Variable                   | Women                            |             |                    |             | Men                              |              |                    |             | Young/Middle-Aged Adults (18-64) |             | Older Adults (65+) |             |
|----------------------------|----------------------------------|-------------|--------------------|-------------|----------------------------------|--------------|--------------------|-------------|----------------------------------|-------------|--------------------|-------------|
|                            | Young/Middle-Aged Adults (18-64) |             | Older Adults (65+) |             | Young/Middle-Aged Adults (18-64) |              | Older Adults (65+) |             |                                  |             |                    |             |
|                            | Odds                             | 95% CI      | Odds               | 95% CI      | Odds                             | 95% CI       | Odds               | 95% CI      | Odds                             | 95% CI      | Odds               | 95% CI      |
| <b>Sex</b>                 |                                  |             |                    |             |                                  |              |                    |             |                                  |             |                    |             |
| Men                        | -                                | -           | -                  | -           | -                                | -            | -                  | -           | Ref.                             | -           | Ref.               | -           |
| Women                      | -                                | -           | -                  | -           | -                                | -            | -                  | -           | <b>1.22</b>                      | (1.20,1.24) | <b>1.59</b>        | (1.57,1.62) |
| <b>Age</b>                 |                                  |             |                    |             |                                  |              |                    |             |                                  |             |                    |             |
| 18-44                      | Ref.                             | -           | -                  | -           | Ref.                             | -            | -                  | -           | Ref.                             | -           | -                  | -           |
| 45-64                      | <b>3.53</b>                      | (3.46,3.60) | -                  | -           | <b>2.57</b>                      | (2.50,2.64)  | -                  | -           | <b>3.14</b>                      | (3.09,3.19) | -                  | -           |
| 65-84                      | -                                | -           | Ref.               | -           | -                                | -            | Ref.               | -           | -                                | -           | Ref.               | -           |
| 85+                        | -                                | -           | <b>1.10</b>        | (1.07,1.13) | -                                | -            | <b>1.10</b>        | (1.06,1.14) | -                                | -           | <b>1.09</b>        | (1.07,1.12) |
| <b>Count of Major ADGs</b> |                                  |             |                    |             |                                  |              |                    |             |                                  |             |                    |             |
| 0 Major ADGs               | Ref.                             | -           | Ref.               | -           | Ref.                             | -            | Ref.               | -           | Ref.                             | -           | Ref.               | -           |
| 1-2 Major ADG              | <b>1.86</b>                      | (1.82,1.89) | <b>1.39</b>        | (1.36,1.42) | <b>2.02</b>                      | (1.97,2.07)  | <b>1.53</b>        | (1.48,1.59) | <b>1.92</b>                      | (1.90,1.95) | <b>1.43</b>        | (1.41,1.46) |
| 3+ Major ADGs              | <b>3.76</b>                      | (3.64,3.89) | <b>1.83</b>        | (1.77,1.89) | <b>3.26</b>                      | (3.13,3.39)  | <b>2.04</b>        | (1.96,2.13) | <b>3.54</b>                      | (3.45,3.63) | <b>1.90</b>        | (1.85,1.94) |
| <b>Count of Minor ADGs</b> |                                  |             |                    |             |                                  |              |                    |             |                                  |             |                    |             |
| 0-1 Minor ADGs             | Ref.                             | -           | Ref.               | -           | Ref.                             | -            | Ref.               | -           | Ref.                             | -           | Ref.               | -           |
| 2-3 Minor ADGs             | <b>3.11</b>                      | (2.98,3.25) | <b>2.84</b>        | (2.69,3.00) | <b>3.59</b>                      | (3.45,3.74)  | <b>2.64</b>        | (2.47,2.83) | <b>3.35</b>                      | (3.25,3.45) | <b>2.77</b>        | (2.65,2.88) |
| 4-5 Minor ADGs             | <b>5.21</b>                      | (4.99,5.43) | <b>4.15</b>        | (3.94,4.38) | <b>6.34</b>                      | (6.08,6.61)  | <b>3.94</b>        | (3.68,4.21) | <b>5.70</b>                      | (5.53,5.87) | <b>4.08</b>        | (3.91,4.25) |
| 6+ Minor ADGs              | <b>9.42</b>                      | (9.04,9.83) | <b>6.96</b>        | (6.61,7.33) | <b>11.70</b>                     | (11.2,12.21) | <b>6.59</b>        | (6.16,7.04) | <b>10.29</b>                     | (9.99,10.6) | <b>6.83</b>        | (6.56,7.12) |
| <b>Income Quintile</b>     |                                  |             |                    |             |                                  |              |                    |             |                                  |             |                    |             |
| Lowest                     | <b>1.33</b>                      | (1.29,1.36) | <b>1.23</b>        | (1.18,1.27) | <b>1.57</b>                      | (1.52,1.63)  | <b>1.14</b>        | (1.10,1.19) | <b>1.41</b>                      | (1.38,1.44) | <b>1.19</b>        | (1.16,1.22) |
| Second                     | <b>1.08</b>                      | (1.05,1.11) | <b>1.13</b>        | (1.09,1.17) | <b>1.19</b>                      | (1.15,1.23)  | <b>1.08</b>        | (1.03,1.12) | <b>1.12</b>                      | (1.10,1.15) | <b>1.11</b>        | (1.08,1.14) |
| Third                      | 0.97                             | (0.95,1.00) | 1.01               | (0.97,1.05) | <b>1.05</b>                      | (1.01,1.09)  | 0.98               | (0.94,1.02) | 1.01                             | (0.98,1.03) | 1.00               | (0.97,1.03) |
| Fourth                     | 0.99                             | (0.96,1.02) | 0.98               | (0.94,1.02) | 1.00                             | (0.97,1.04)  | <b>0.93</b>        | (0.89,0.97) | 0.99                             | (0.97,1.02) | 0.96               | (0.93,0.98) |
| Fifth                      | Ref.                             | -           | Ref.               | -           | Ref.                             | -            | Ref.               | -           | Ref.                             | -           | Ref.               | -           |
| <b>Relationship Status</b> |                                  |             |                    |             |                                  |              |                    |             |                                  |             |                    |             |
| Marriage-like relationship | Ref.                             | -           | Ref.               | -           | Ref.                             | -            | Ref.               | -           | Ref.                             | -           | Ref.               | -           |
| Single                     | <b>1.40</b>                      | (1.37,1.43) | <b>1.10</b>        | (1.08,1.13) | <b>1.61</b>                      | (1.57,1.65)  | <b>1.29</b>        | (1.25,1.33) | <b>1.48</b>                      | (1.46,1.50) | <b>1.16</b>        | (1.14,1.19) |
| <b>Ethnicity</b>           |                                  |             |                    |             |                                  |              |                    |             |                                  |             |                    |             |

1  
2  
3  
4  
5  
6  
7  
8  
9  
10  
11  
12  
13  
14  
15  
16  
17  
18  
19  
20  
21  
22  
23  
24  
25  
26  
27  
28  
29  
30  
31  
32  
33  
34  
35  
36  
37  
38  
39  
40  
41  
42  
43  
44  
45  
46  
47  
48  
49

| Variable                         | Women                            |             |                    |             | Men                              |             |                    |             | Young/Middle-Aged Adults (18-64) |             | Older Adults (65+) |             |
|----------------------------------|----------------------------------|-------------|--------------------|-------------|----------------------------------|-------------|--------------------|-------------|----------------------------------|-------------|--------------------|-------------|
|                                  | Young/Middle-Aged Adults (18-64) |             | Older Adults (65+) |             | Young/Middle-Aged Adults (18-64) |             | Older Adults (65+) |             | Odds                             | 95% CI      | Odds               | 95% CI      |
|                                  | Odds                             | 95% CI      | Odds               | 95% CI      | Odds                             | 95% CI      | Odds               | 95% CI      |                                  |             |                    |             |
| Other                            | Ref.                             | -           | Ref.               | -           | Ref.                             | -           | Ref.               | -           | Ref.                             | -           | Ref.               | -           |
| Chinese                          | <b>0.29</b>                      | (0.28,0.31) | <b>0.47</b>        | (0.45,0.49) | <b>0.34</b>                      | (0.32,0.36) | <b>0.55</b>        | (0.52,0.59) | <b>0.31</b>                      | (0.30,0.32) | <b>0.50</b>        | (0.48,0.52) |
| South Asian                      | <b>0.35</b>                      | (0.33,0.37) | <b>0.44</b>        | (0.41,0.47) | <b>0.53</b>                      | (0.50,0.57) | <b>0.60</b>        | (0.55,0.65) | <b>0.42</b>                      | (0.40,0.43) | <b>0.49</b>        | (0.47,0.52) |
| <b>Neighborhood Urbanization</b> |                                  |             |                    |             |                                  |             |                    |             |                                  |             |                    |             |
| Urban                            | Ref.                             | -           | Ref.               | -           | Ref.                             | -           | Ref.               | -           | Ref.                             | -           | Ref.               | -           |
| Rural                            | <b>1.08</b>                      | (1.04,1.12) | <b>0.95</b>        | (0.91,0.98) | 0.98                             | (0.93,1.02) | 0.98               | (0.94,1.03) | <b>1.04</b>                      | (1.01,1.07) | <b>0.96</b>        | (0.93,0.99) |

Note: Long-term sedative use defined by the filling of prescriptions containing a total of 90 or more days' supply of sedative during the calendar year. Aggregated Diagnostic Groups (ADGs) map ICD-9 and ICD-10 codes into 32 mutually-exclusive groups based on similar levels of severity, persistence, and health resource requirements. Of these groups, 8 have very high expected resource use and are labeled as major ADGs. Remaining ADGs are considered minor. Marriage-like relationships include common-law and married relationships between two same sex or opposite sex adults. Drugs included as benzodiazepines and z-drugs are provided in Appendix A. We report 95% confidence intervals (CIs). Odds ratios are adjusted for all listed variables.

1  
2  
3  
4  
5 **Appendix A**  
6  
7

8 *ATC Level 5 codes identifying benzodiazepine and z-drug dispensations*  
9

10  
11  
12  
13  
14  
15  
16  
17  
18  
19  
20  
21  
22  
23  
24  
25  
26  
27  
28  
29  
30  
31  
32  
33  
34  
35  
36  
37  
38  
39  
40  
41  
42  
43  
44  
45  
46  
47  
48  
49  
50  
51  
52  
53  
54  
55  
56  
57  
58  
59  
60

| ATC 5 CODE | ATC 5 NAME            | Drug Class      |
|------------|-----------------------|-----------------|
| N03AE01    | CLONAZEPAM            | Benzodiazepines |
| N05BA01    | DIAZEPAM              | Benzodiazepines |
| N05BA02    | CHLORDIAZEPOXIDE      | Benzodiazepines |
| N05BA05    | CLORAZEPATE POTASSIUM | Benzodiazepines |
| N05CD01    | FLURAZEPAM            | Benzodiazepines |
| N05BA04    | OXAZEPAM              | Benzodiazepines |
| N05BA06    | LORAZEPAM             | Benzodiazepines |
| N05BA12    | ALPRAZOLAM            | Benzodiazepines |
| N05CD05    | TRIAZOLAM             | Benzodiazepines |
| N05CD07    | TEMAZEPAM             | Benzodiazepines |
| N05BA08    | BROMAZEPAM            | Benzodiazepines |
| N05CD02    | NITRAZEPAM            | Benzodiazepines |
| N05CF01    | ZOPICLONE             | Z-drugs         |
| N05CF02    | ZOLPIDEM              | Z-drugs         |
| N05CF03    | ZALEPLON              | Z-drugs         |

1  
2  
3 **Appendix B**  
4  
5  
6

7 *Supplemental Figure 1A: Age profile of the population of community-dwelling, long-term*  
8 *sedative users, women aged 18 and older, British Columbia, 2013*  
9

10  
11  
12 *Supplemental Figure 1B: Age profile of the population of community-dwelling, long-term*  
13 *sedative users, men aged 18 and older, British Columbia, 2013*  
14  
15  
16  
17  
18  
19  
20  
21  
22  
23  
24  
25  
26  
27  
28  
29  
30  
31  
32  
33  
34  
35  
36  
37  
38  
39  
40  
41  
42  
43  
44  
45  
46  
47  
48  
49  
50  
51  
52  
53  
54  
55  
56  
57  
58  
59  
60

Confidential



Figure 1: Age-standardized prevalence of overall (short-term and long-term) sedative use among community-dwelling women and men aged 18 and older, British Columbia, 2004 to 2013

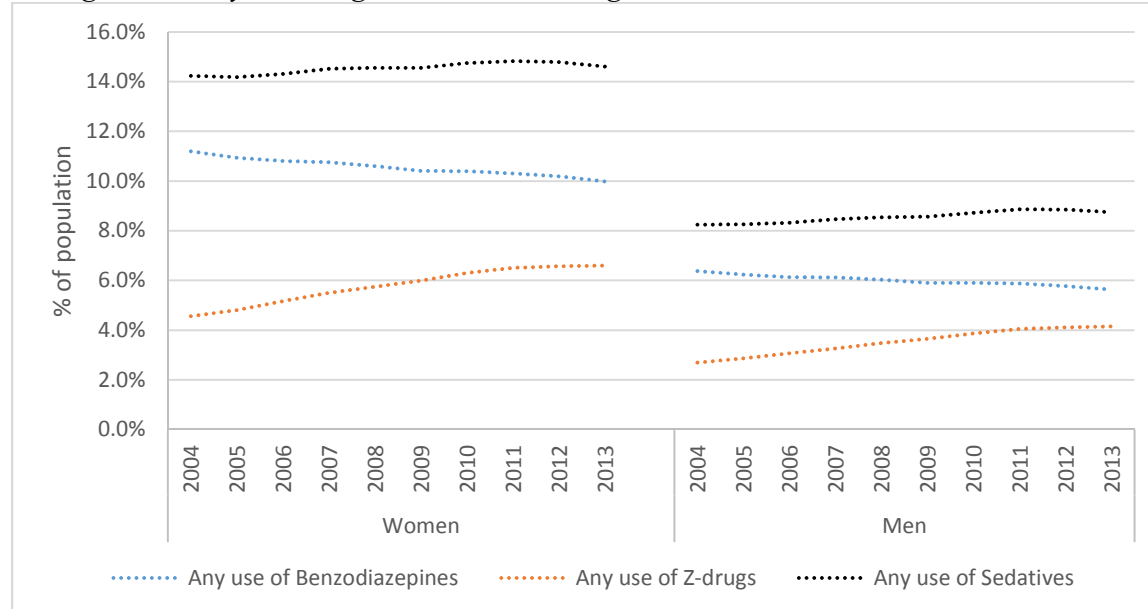

Note: Sedative use defined by the filling of one or more sedative prescription during the calendar year. Age-standardization performed using the 2013 population in four age categories (18–44, 45–64, 65–84, and 85+).

Figure 2A: Age-standardized prevalence of overall sedative use among community-dwelling women and men aged 65 and older, British Columbia, 2004 to 2013

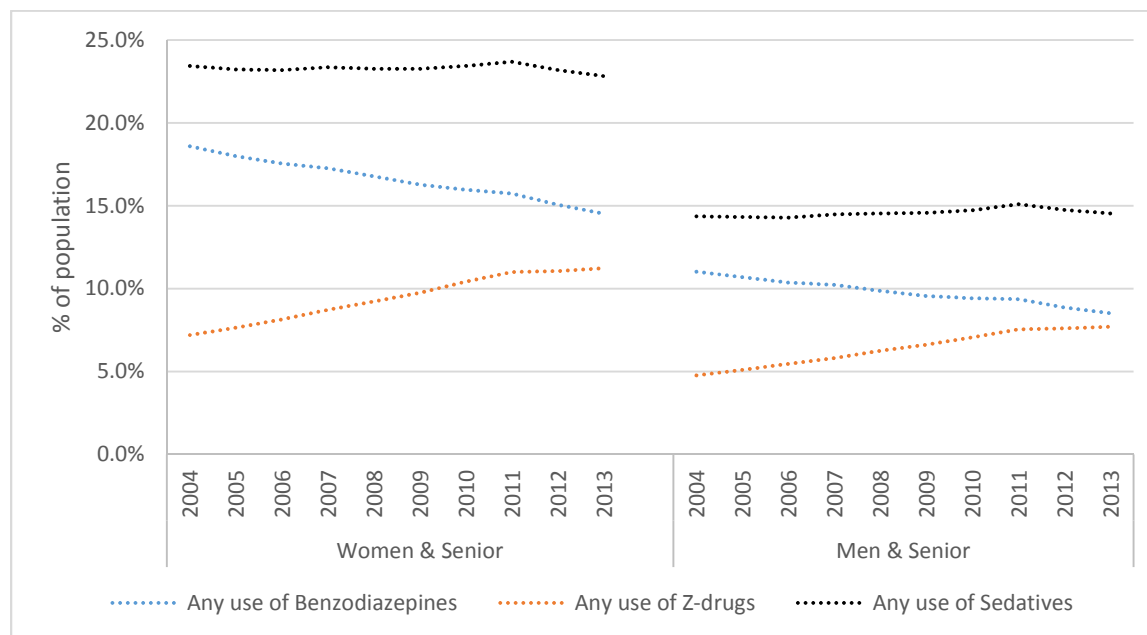

Figure 2B: Age-standardized prevalence of overall sedative use among community-dwelling women and men aged 18 to 64, British Columbia, 2004 to 2013

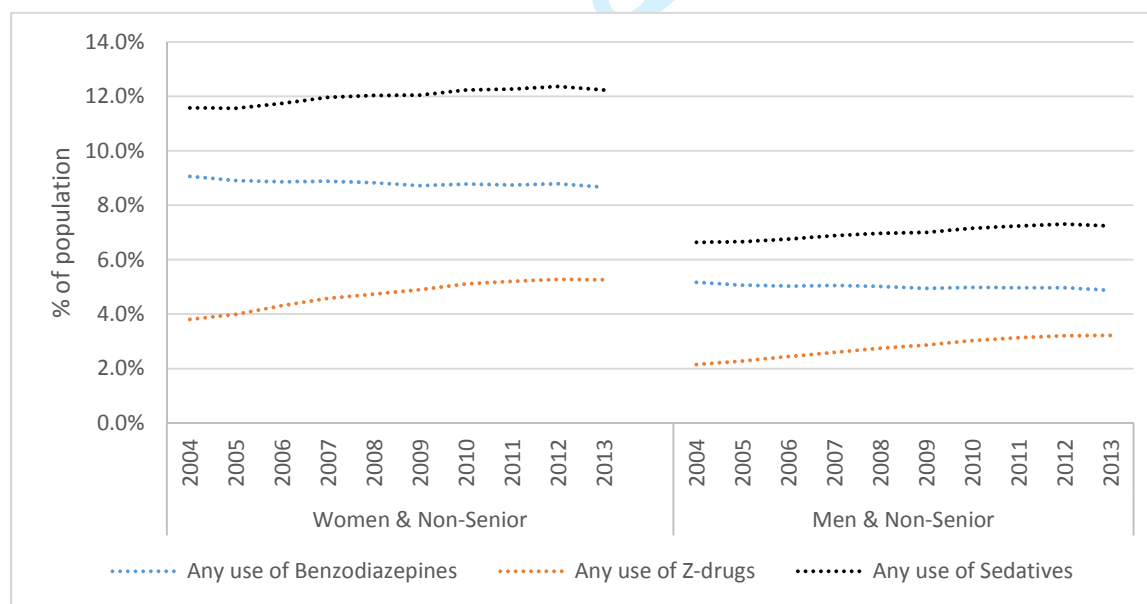

Note: Sedative use defined by the filling of one or more sedative prescription during the calendar year. Age-standardization performed using the 2013 population in four age categories (18–44, 45–64, 65–84, and 85+).

Figure 3A: Age-standardized prevalence of long-term sedative use among community-dwelling women and men aged 65 and older, British Columbia, 2004 to 2013

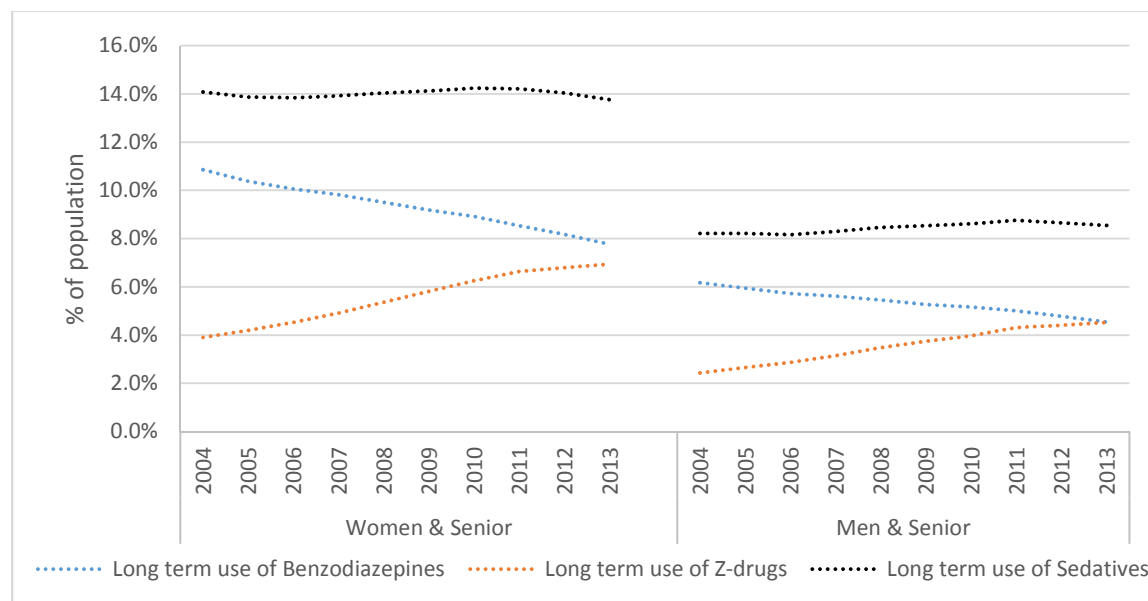

Figure 3B: Age-standardized prevalence of long-term sedative use among community-dwelling women and men aged 18 to 64, British Columbia, 2004 to 2013

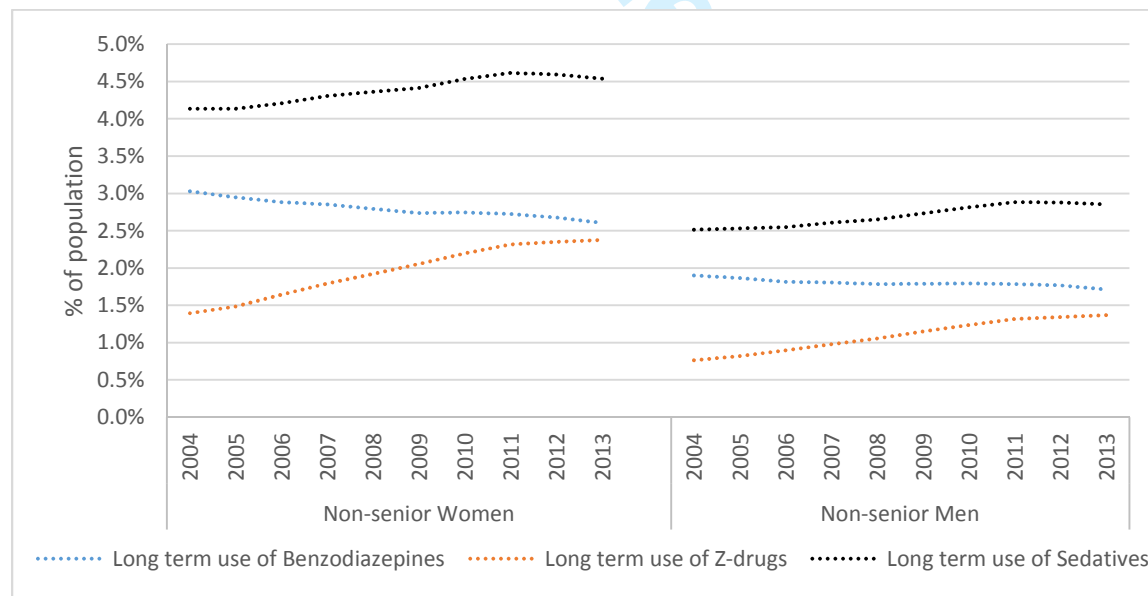

Note: Long-term sedative use defined by the filling of prescriptions containing a total of 90 or more days' supply of sedative during the calendar year. Age-standardization performed using the 2013 population in four age categories (18–44, 45–64, 65–84, and 85+).

1  
2  
3  
4  
5  
6  
7  
8  
9  
10  
11  
12  
13  
14  
15  
16  
17  
18  
19  
20  
21  
22  
23  
24  
25  
26  
27  
28  
29  
30  
31  
32  
33  
34  
35  
36  
37  
38  
39  
40  
41  
42  
43  
44  
45  
46  
47  
48  
49  
50  
51  
52  
53  
54  
55  
56  
57  
58  
59  
60

Supplemental Figure 1A

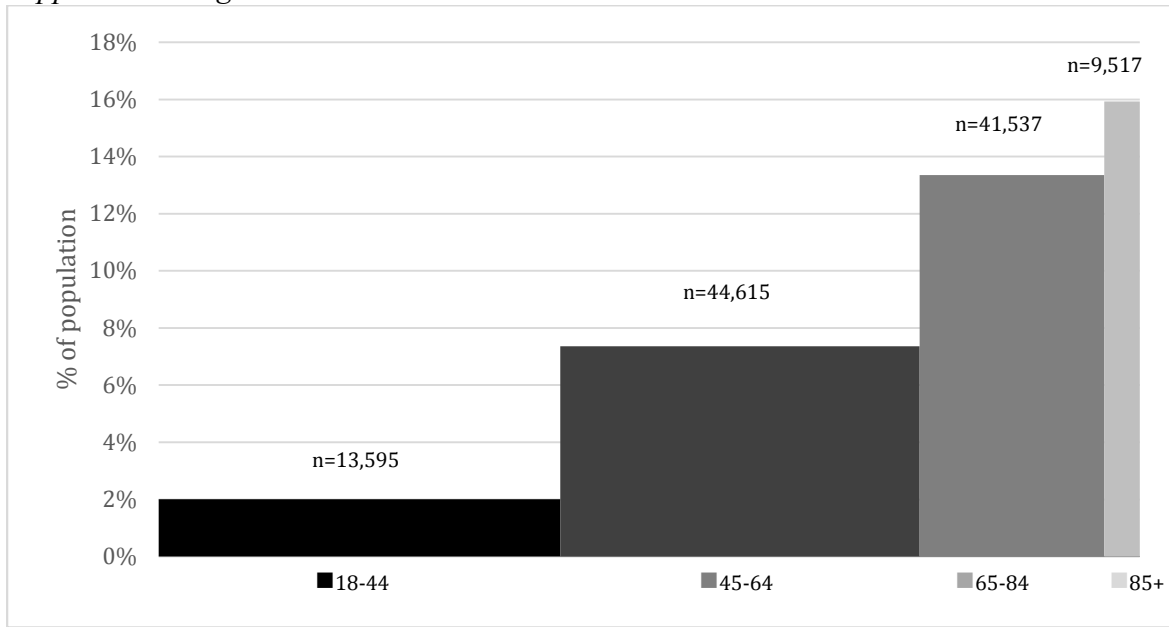

Supplemental Figure 1B

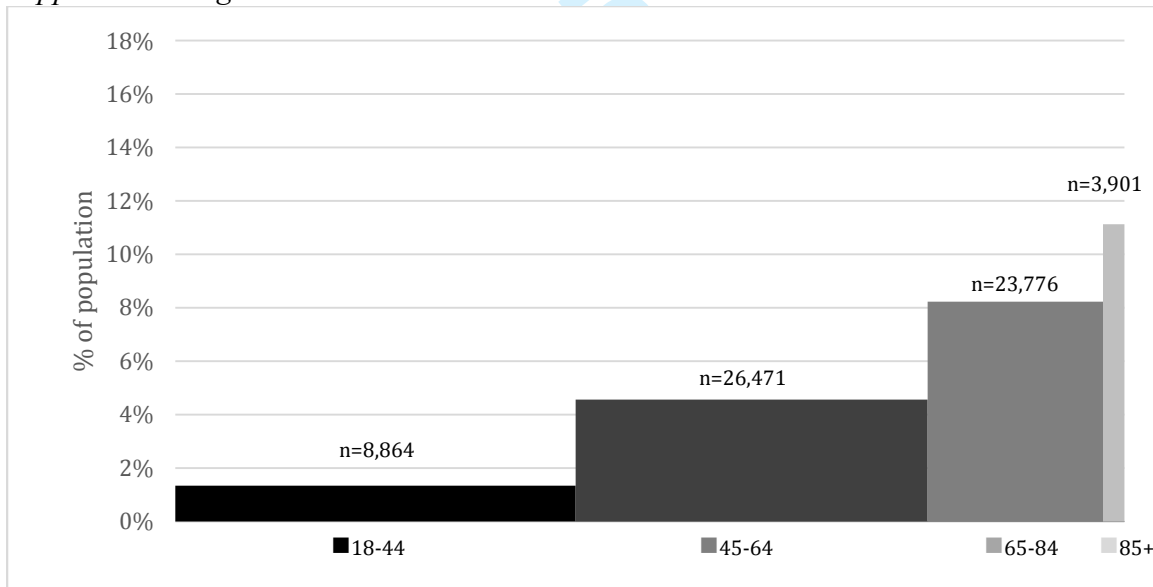

Note: Long-term sedative use defined by the filling of prescriptions containing a total of 90 or more days' supply of sedative during the calendar year. Bar width scaled by population size and n is equal to the number of long-term sedative users in each age group

## STROBE Statement—checklist of items that should be included in reports of observational studies

|                           | Item No. | Recommendation                                                                                                                                                                                                                                                                                                                                                                                                                                                         | Page No. | Relevant text from manuscript                                                                                                                     |
|---------------------------|----------|------------------------------------------------------------------------------------------------------------------------------------------------------------------------------------------------------------------------------------------------------------------------------------------------------------------------------------------------------------------------------------------------------------------------------------------------------------------------|----------|---------------------------------------------------------------------------------------------------------------------------------------------------|
| <b>Title and abstract</b> | 1        | (a) Indicate the study's design with a commonly used term in the title or the abstract                                                                                                                                                                                                                                                                                                                                                                                 | 1 & 2    | Title: A population-based <b>longitudinal analysis</b> of long-term sedative use among community-dwelling adults<br>Also see Methods in Abstract. |
|                           |          | (b) Provide in the abstract an informative and balanced summary of what was done and what was found                                                                                                                                                                                                                                                                                                                                                                    | 2        | See Methods & Results in Abstract                                                                                                                 |
| <b>Introduction</b>       |          |                                                                                                                                                                                                                                                                                                                                                                                                                                                                        |          |                                                                                                                                                   |
| Background/rationale      | 2        | Explain the scientific background and rationale for the investigation being reported                                                                                                                                                                                                                                                                                                                                                                                   | 3        | Introduction – paragraph 1                                                                                                                        |
| Objectives                | 3        | State specific objectives, including any prespecified hypotheses                                                                                                                                                                                                                                                                                                                                                                                                       | 3        | Introduction – paragraph 2                                                                                                                        |
| <b>Methods</b>            |          |                                                                                                                                                                                                                                                                                                                                                                                                                                                                        |          |                                                                                                                                                   |
| Study design              | 4        | Present key elements of study design early in the paper                                                                                                                                                                                                                                                                                                                                                                                                                | 4        | See Methods                                                                                                                                       |
| Setting                   | 5        | Describe the setting, locations, and relevant dates, including periods of recruitment, exposure, follow-up, and data collection                                                                                                                                                                                                                                                                                                                                        | 4        | See Methods, paragraph 1                                                                                                                          |
| Participants              | 6        | (a) <i>Cohort study</i> —Give the eligibility criteria, and the sources and methods of selection of participants. Describe methods of follow-up<br><i>Case-control study</i> —Give the eligibility criteria, and the sources and methods of case ascertainment and control selection. Give the rationale for the choice of cases and controls<br><i>Cross-sectional study</i> —Give the eligibility criteria, and the sources and methods of selection of participants | 4-5      | See Methods – Data and Derived Variables sections<br><b>Population-based analysis</b>                                                             |
|                           |          | (b) <i>Cohort study</i> —For matched studies, give matching criteria and number of exposed and unexposed<br><i>Case-control study</i> —For matched studies, give matching criteria and the number of controls per case                                                                                                                                                                                                                                                 |          |                                                                                                                                                   |
| Variables                 | 7        | Clearly define all outcomes, exposures, predictors, potential confounders, and effect modifiers. Give diagnostic criteria, if applicable                                                                                                                                                                                                                                                                                                                               | 6        | See Definitions and Statistical Analysis sections in Methods                                                                                      |
| Data sources/             | 8*       | For each variable of interest, give sources of data and details of methods of assessment                                                                                                                                                                                                                                                                                                                                                                               | 4-5      | See Data, Derived Variables,                                                                                                                      |

1  
2  
3  
4  
5  
6  
7  
8  
9  
10  
11  
12  
13  
14  
15  
16  
17  
18  
19  
20  
21  
22  
23  
24  
25  
26  
27  
28  
29  
30  
31  
32  
33  
34  
35  
36  
37  
38  
39  
40  
41  
42  
43  
44  
45  
46  
47  
48  
49

|             |    |                                                                                             |     |                                                                                                                                                                                                          |
|-------------|----|---------------------------------------------------------------------------------------------|-----|----------------------------------------------------------------------------------------------------------------------------------------------------------------------------------------------------------|
| measurement |    | (measurement). Describe comparability of assessment methods if there is more than one group |     | and Definitions sections in Methods.                                                                                                                                                                     |
| Bias        | 9  | Describe any efforts to address potential sources of bias                                   | 4-6 | See exclusion criteria throughout Data and Derived Variables section of Methods. See discussion of covariates included in Statistical Analysis section of Methods to account for observable confounding. |
| Study size  | 10 | Explain how the study size was arrived at                                                   | 4-5 | See exclusion criteria throughout Data and Derived Variables section of Methods.                                                                                                                         |

Continued on next page

Confidential

|    |                        |     |                                                                                                                                                                                                   |     |                                                                                                                                                 |  |
|----|------------------------|-----|---------------------------------------------------------------------------------------------------------------------------------------------------------------------------------------------------|-----|-------------------------------------------------------------------------------------------------------------------------------------------------|--|
| 1  |                        |     |                                                                                                                                                                                                   |     |                                                                                                                                                 |  |
| 2  |                        |     |                                                                                                                                                                                                   |     |                                                                                                                                                 |  |
| 3  |                        |     |                                                                                                                                                                                                   |     |                                                                                                                                                 |  |
| 4  | Quantitative variables | 11  | Explain how quantitative variables were handled in the analyses. If applicable, describe which groupings were chosen and why                                                                      | 6   | See Definitions in Methods.                                                                                                                     |  |
| 5  |                        |     |                                                                                                                                                                                                   |     |                                                                                                                                                 |  |
| 6  | Statistical methods    | 12  | (a) Describe all statistical methods, including those used to control for confounding                                                                                                             | 6   | See Statistical Analysis section in Methods                                                                                                     |  |
| 7  |                        |     |                                                                                                                                                                                                   |     |                                                                                                                                                 |  |
| 8  |                        |     | (b) Describe any methods used to examine subgroups and interactions                                                                                                                               | 6   | See Statistical Analysis section in Methods where we explain stratification by sex and age groups of young/middle-aged adults and older adults. |  |
| 9  |                        |     |                                                                                                                                                                                                   |     |                                                                                                                                                 |  |
| 10 |                        |     | (c) Explain how missing data were addressed                                                                                                                                                       | 5   | See description of exclusion of missing household and income data in Derived Variables section of Methods.                                      |  |
| 11 |                        |     |                                                                                                                                                                                                   |     |                                                                                                                                                 |  |
| 12 |                        |     | (d) <i>Cohort study</i> —If applicable, explain how loss to follow-up was addressed                                                                                                               | N/A | – Population-based analysis                                                                                                                     |  |
| 13 |                        |     | <i>Case-control study</i> —If applicable, explain how matching of cases and controls was addressed                                                                                                |     |                                                                                                                                                 |  |
| 14 |                        |     | <i>Cross-sectional study</i> —If applicable, describe analytical methods taking account of sampling strategy                                                                                      |     |                                                                                                                                                 |  |
| 15 |                        |     | (e) Describe any sensitivity analyses                                                                                                                                                             | N/A |                                                                                                                                                 |  |
| 16 |                        |     |                                                                                                                                                                                                   |     |                                                                                                                                                 |  |
| 17 |                        |     |                                                                                                                                                                                                   |     |                                                                                                                                                 |  |
| 18 |                        |     |                                                                                                                                                                                                   |     |                                                                                                                                                 |  |
| 19 |                        |     |                                                                                                                                                                                                   |     |                                                                                                                                                 |  |
| 20 |                        |     |                                                                                                                                                                                                   |     |                                                                                                                                                 |  |
| 21 |                        |     |                                                                                                                                                                                                   |     |                                                                                                                                                 |  |
| 22 |                        |     |                                                                                                                                                                                                   |     |                                                                                                                                                 |  |
| 23 |                        |     |                                                                                                                                                                                                   |     |                                                                                                                                                 |  |
| 24 |                        |     |                                                                                                                                                                                                   |     |                                                                                                                                                 |  |
| 25 |                        |     |                                                                                                                                                                                                   |     |                                                                                                                                                 |  |
| 26 |                        |     |                                                                                                                                                                                                   |     |                                                                                                                                                 |  |
| 27 |                        |     |                                                                                                                                                                                                   |     |                                                                                                                                                 |  |
| 28 | <b>Results</b>         |     |                                                                                                                                                                                                   |     |                                                                                                                                                 |  |
| 29 | Participants           | 13* | (a) Report numbers of individuals at each stage of study—eg numbers potentially eligible, examined for eligibility, confirmed eligible, included in the study, completing follow-up, and analysed | 7   | See paragraph 1 of Results                                                                                                                      |  |
| 30 |                        |     |                                                                                                                                                                                                   |     |                                                                                                                                                 |  |
| 31 |                        |     | (b) Give reasons for non-participation at each stage                                                                                                                                              | 5-6 | Described in text in Methods                                                                                                                    |  |
| 32 |                        |     | (c) Consider use of a flow diagram                                                                                                                                                                |     |                                                                                                                                                 |  |
| 33 |                        |     |                                                                                                                                                                                                   |     |                                                                                                                                                 |  |
| 34 | Descriptive data       | 14* | (a) Give characteristics of study participants (eg demographic, clinical, social) and information on exposures and potential confounders                                                          | 9   | See Variation in sedative use among community dwelling adults in 2013 section of Results                                                        |  |
| 35 |                        |     |                                                                                                                                                                                                   |     |                                                                                                                                                 |  |
| 36 |                        |     | (b) Indicate number of participants with missing data for each variable of interest                                                                                                               | N/A | – as described in Methods, excluded these participants from analysis                                                                            |  |
| 37 |                        |     |                                                                                                                                                                                                   |     |                                                                                                                                                 |  |
| 38 |                        |     |                                                                                                                                                                                                   |     |                                                                                                                                                 |  |
| 39 |                        |     |                                                                                                                                                                                                   |     |                                                                                                                                                 |  |
| 40 |                        |     |                                                                                                                                                                                                   |     |                                                                                                                                                 |  |
| 41 |                        |     |                                                                                                                                                                                                   |     |                                                                                                                                                 |  |
| 42 |                        |     |                                                                                                                                                                                                   |     |                                                                                                                                                 |  |
| 43 |                        |     |                                                                                                                                                                                                   |     |                                                                                                                                                 |  |
| 44 |                        |     |                                                                                                                                                                                                   |     |                                                                                                                                                 |  |
| 45 |                        |     |                                                                                                                                                                                                   |     |                                                                                                                                                 |  |
| 46 |                        |     |                                                                                                                                                                                                   |     |                                                                                                                                                 |  |
| 47 |                        |     |                                                                                                                                                                                                   |     |                                                                                                                                                 |  |
| 48 |                        |     |                                                                                                                                                                                                   |     |                                                                                                                                                 |  |
| 49 |                        |     |                                                                                                                                                                                                   |     |                                                                                                                                                 |  |

1  
2  
3  
4  
5  
6  
7  
8  
9  
10  
11  
12  
13  
14  
15  
16  
17  
18  
19  
20  
21  
22  
23  
24  
25  
26  
27  
28  
29  
30  
31  
32  
33  
34  
35  
36  
37  
38  
39  
40  
41  
42  
43  
44  
45  
46  
47  
48  
49

|              |     |                                                                                                                                                                                                              |      |                                                                                     |
|--------------|-----|--------------------------------------------------------------------------------------------------------------------------------------------------------------------------------------------------------------|------|-------------------------------------------------------------------------------------|
|              |     | (c) <i>Cohort study</i> —Summarise follow-up time (eg, average and total amount)                                                                                                                             |      |                                                                                     |
| Outcome data | 15* | <i>Cohort study</i> —Report numbers of outcome events or summary measures over time                                                                                                                          |      |                                                                                     |
|              |     | <i>Case-control study</i> —Report numbers in each exposure category, or summary measures of exposure                                                                                                         |      |                                                                                     |
|              |     | <i>Cross-sectional study</i> —Report numbers of outcome events or summary measures                                                                                                                           | 7-9  | <i>See Results. Also see Table 1 and Figures.</i>                                   |
| Main results | 16  | (a) Give unadjusted estimates and, if applicable, confounder-adjusted estimates and their precision (eg, 95% confidence interval). Make clear which confounders were adjusted for and why they were included | 9-10 | Adjusted odds ratios with confidence intervals presented in Results and in Table 2. |
|              |     | (b) Report category boundaries when continuous variables were categorized                                                                                                                                    |      | N/A                                                                                 |
|              |     | (c) If relevant, consider translating estimates of relative risk into absolute risk for a meaningful time period                                                                                             |      | N/A                                                                                 |

Continued on next page

Confidential



|                          |    |                                                                                                                                                                            |       |                                                          |
|--------------------------|----|----------------------------------------------------------------------------------------------------------------------------------------------------------------------------|-------|----------------------------------------------------------|
| Other analyses           | 17 | Report other analyses done—eg analyses of subgroups and interactions, and sensitivity analyses                                                                             | 7-9   | Age-standardized trends analysis is reported in Results. |
| <b>Discussion</b>        |    |                                                                                                                                                                            |       |                                                          |
| Key results              | 18 | Summarise key results with reference to study objectives                                                                                                                   | 10-11 | Paragraphs 1, 2, and 3 of Interpretation                 |
| Limitations              | 19 | Discuss limitations of the study, taking into account sources of potential bias or imprecision. Discuss both direction and magnitude of any potential bias                 | 11-12 | See Study Limitations section of Results.                |
| Interpretation           | 20 | Give a cautious overall interpretation of results considering objectives, limitations, multiplicity of analyses, results from similar studies, and other relevant evidence | 12    | See Conclusions section of Results                       |
| Generalisability         | 21 | Discuss the generalisability (external validity) of the study results                                                                                                      | 12    | See Study Limitations section of Results.                |
| <b>Other information</b> |    |                                                                                                                                                                            |       |                                                          |
| Funding                  | 22 | Give the source of funding and the role of the funders for the present study and, if applicable, for the original study on which the present article is based              | 13    | Funding information provided.                            |

\*Give information separately for cases and controls in case-control studies and, if applicable, for exposed and unexposed groups in cohort and cross-sectional studies.

**Note:** An Explanation and Elaboration article discusses each checklist item and gives methodological background and published examples of transparent reporting. The STROBE checklist is best used in conjunction with this article (freely available on the Web sites of PLoS Medicine at <http://www.plosmedicine.org/>, Annals of Internal Medicine at <http://www.annals.org/>, and Epidemiology at <http://www.epidem.com/>). Information on the STROBE Initiative is available at [www.strobe-statement.org](http://www.strobe-statement.org).
